# Supplementary material for: Prevalence of STIs and people’s satisfaction in a general population STI testing site in Bern, Switzerland
Source: HighWire-hosted journal article supplement (doi:10.1136/sextrans-2022-055472), 2022-11-29
Supplement: sextrans-2022-055472supp001_data_supplement.pdf [file sextrans-2022-055472supp001_data_supplement.pdf]

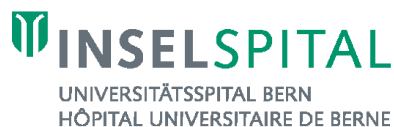

## Anonymous HIV- and STI-testing site, Department of Infectious Disease, University Hospital Bern

This questionnaire is used to collect data for a dissertation at the University of Bern about the epidemiology of sexually transmitted infections (STIs). The main aim is to optimize the user-friendliness of our service. All information is voluntary and anonymous. The data will be treated confidentially, not passed on to third parties, and used exclusively for the dissertation in order to improve our service quality.

Date:

Date of birth:

### 1. What gender do you identify as today?

- Man
- Woman
- Undefined

### 2. Who do you (also just occasionally) have sexual relations with?

- Men
- Women
- Both

### 3. Which factors are important for you when attending the STI testing site?

|                                                  | (5) = most important     | (4) = important          | (3) = indifferent        | (2) = not important      | (1) = least important    |
|--------------------------------------------------|--------------------------|--------------------------|--------------------------|--------------------------|--------------------------|
| Anonymity                                        | <input type="checkbox"/> |
| Cost                                             | <input type="checkbox"/> |
| Discrete payment                                 | <input type="checkbox"/> |
| Online registration                              | <input type="checkbox"/> |
| Location                                         | <input type="checkbox"/> |
| Notification of results (E-mail, telephone call) | <input type="checkbox"/> |

|                      |                          |                          |                          |                          |                          |
|----------------------|--------------------------|--------------------------|--------------------------|--------------------------|--------------------------|
| Offer of testing     | <input type="checkbox"/> |
| Personal counselling | <input type="checkbox"/> |

#### 4. Which topics do you find important to be discussed during your personal consultation?

|                              | (5) = most important     | (4) = important          | (3) = indifferent        | (2) = not important      | (1) = least important    |
|------------------------------|--------------------------|--------------------------|--------------------------|--------------------------|--------------------------|
| Common infections            | <input type="checkbox"/> |
| Protection (e.g. condom use) | <input type="checkbox"/> |
| Risk factors for STIs        | <input type="checkbox"/> |
| PEP and PREP                 | <input type="checkbox"/> |
| HPV                          | <input type="checkbox"/> |
| Partner notification         | <input type="checkbox"/> |

#### 5. What are possible improvements to the STI testing site?

|                                                    |                          |
|----------------------------------------------------|--------------------------|
| Website (e.g. user friendliness)                   | <input type="checkbox"/> |
| Drop in appointments (without planned appointment) | <input type="checkbox"/> |
| Notification system                                | <input type="checkbox"/> |
| Waiting room                                       | <input type="checkbox"/> |
| Location of testing site (accessibility)           | <input type="checkbox"/> |

#### Other suggestions of improvement:

.....

.....

.....
